# Supplementary figures and images for: Spatial reflection patterns of iridescent wings of male pierid butterflies: curved scales reflect at a wider angle than flat scales
Source: PubMed Central journal article supplement — J Comp Physiol A Neuroethol Sens Neural Behav Physiol. 2011 Jul 9;197(10):987–97. doi: 10.1007/s00359-011-0661-6 (PMC3176396; doi:10.1007/s00359-011-0661-6), 2011-07-09

Figure S1

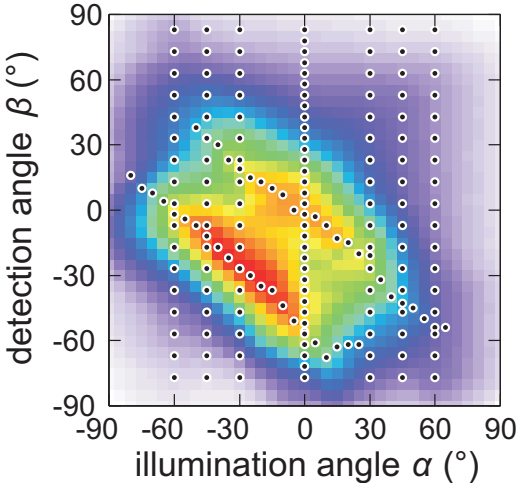

Supplement: 359_2011_661_MOESM1_ESM.pdf [file 359_2011_661_MOESM1_ESM.pdf]

Figure S2

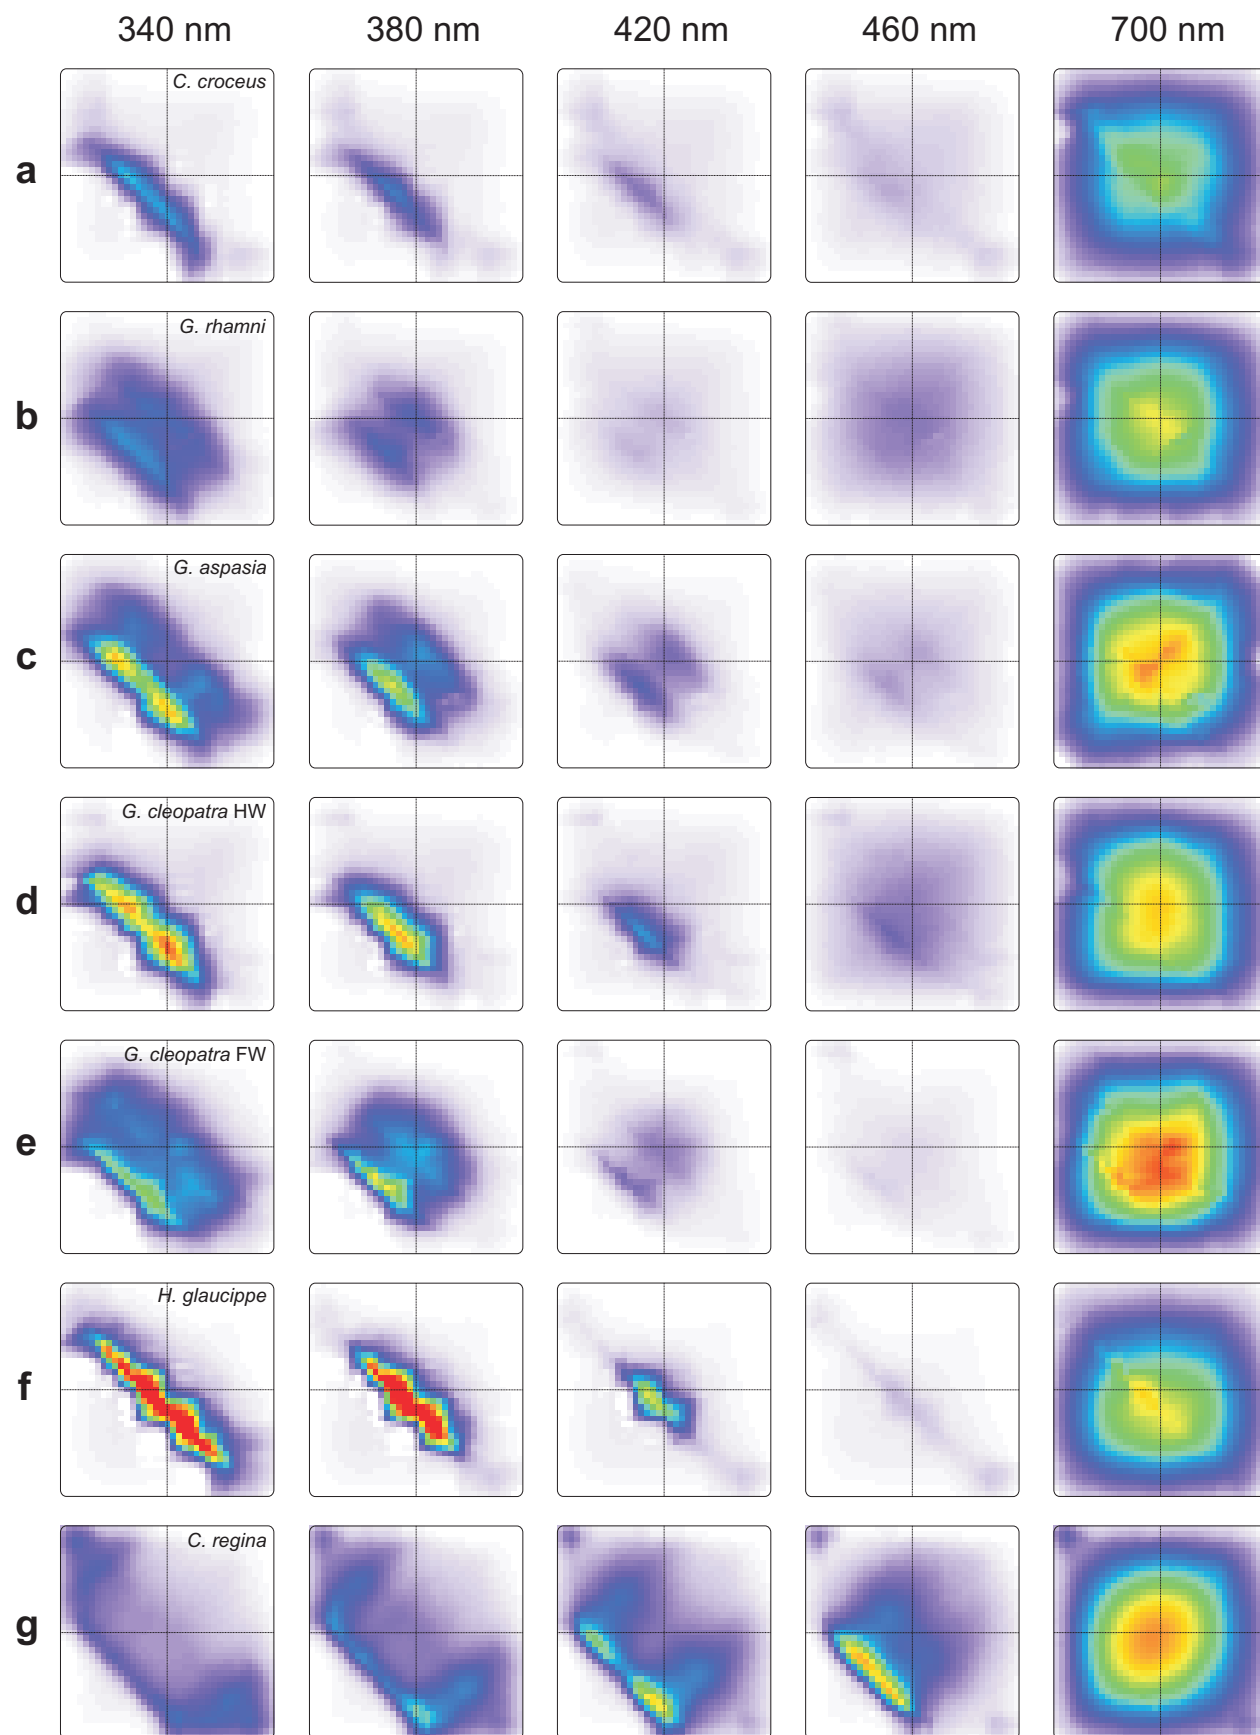

Supplement: 359_2011_661_MOESM2_ESM.pdf [file 359_2011_661_MOESM2_ESM.pdf]
